# Supplementary material
Source: publisher site journal article supplement (https://www.dovepress.com/article/419579)
Supplement: Supplementary file 1 [file get_supplementary_file.php]

**Supplementary Tables**

| **Supplemental Table S1:** Overview of the antibodies used for flow cytometry experiments | | | | | | |
| --- | --- | --- | --- | --- | --- | --- |
| Antigen | Fluorochrome conjugated | Specificity | Clone | Application | company | Cat# |
|  |
| CD45 | FITC | Mouse IgG1, κ | HI30 | FC | Biolegend | 304054 |  |
| κ isotype Ctrl |  | Mouse IgG1 |  |  | Biolegend | 400107 |  |
| CD66b | PerCP/Cyanine5.5 | Mouse IgM, κ | G10F5 | FC | Biolegend | 305108 |  |
| Isotype Ctrl |  | Mouse IgM |  |  | Biolegend | 401623 |  |
| CD14 | APC | Mouse IgG1, κ | 63D3 | FC | Biolegend | 367118 |  |
| Isotype Ctrl (FC) |  | Mouse IgG1 |  |  | Biolegend | 400121 |  |
| CD16 | PE | Mouse IgG1, κ | 3G8 | FC | Biolegend | 302008 |  |
|  |  | Mouse IgG1 |  |  | Biolegend | 400111 |  |

| **Supplemental Table S2** Clinical and laboratory characteristics in CAD patients stratified by vessel lesion | | | | |
| --- | --- | --- | --- | --- |
| **Variable** | **Single vessel lesion**  **(n = 8549)** | **Double or more**  **vessel lesions**  **(n =3211)** | **P value** |  |
| Age (years) | 58.74 ± 10.88 | 60.94 ± 10.60 | 0.1 |  |
| Male, n (%) | 6114 (71.5) | 2451 (76.3) | ＜0.001 |  |
| BMI (kg/m2) | 26.08 ± 3.77 | 26.2 ± 3.82 | 0.39 |  |
| SBP (mmHg) | 139.52 ± 32.50 | 142.59 ± 31.63 | 0.15 |  |
| DBP (mmHg) | 87.09 ± 19.22 | 86.88 ± 19.22 | 0.78 |  |
| LVEF, (%) | 61.30 ± 8.49 | 59.77 ± 8.26 | 0.07 |  |
| Blood glucose (mmol/L) | 5.24 (4.65 - 6.46) | 5.61(4.75 - 7.28) | ＜0.001 |  |
| Hypertension, n (%) | 2641 (30.9) | 1416 (44.1) | ＜0.001 |  |
| Diabetes, n (%) | 2879 (33.7) | 1506 (46.9) | ＜0.001 |  |
| smoker, n (%) | 3619 (57.7) | 1452 (45.2) | 0.005 |  |
| drinking, n (%) | 2083 (24.4) | 744 (23.2) | 0.18 |  |
| Dyslipidaemia, n (%) | 4510 (52.8) | 1645 (51.2) | 0.14 |  |
| Family history of CAD, n (%) | 2127 (24.9) | 877 (27.3) | 0.007 |  |
| Medication |  |  |  |  |
| Aspirins, n (%) | 135 (1.6) | 243 (7.6) | ＜0.001 |  |
| ACEI ⁄ ARB, n (%) | 267 (3.1) | 264 (8.2) | ＜0.001 |  |
| Statins, n (%) | 130 (1.5) | 258 (8.0) | ＜0.001 |  |
| Beta blocker, n (%) | 160 (1.9) | 184 (5.7) | ＜0.001 |  |
| Comorbidities |  |  |  |  |
| History of stroke, n (%) | 33 (0.4) | 17 (0.5) | 0.34 |  |
| TC (mmol/L) | 1.60 (1.13 - 2.31) | 1.60 (1.17 - 2.30) | 0.59 |  |
| LDL-C (mmol/L) | 2.43 (1.86 - 3.09) | 2.41 (1.89 - 3.09) | 0.28 |  |
| HDL-C (mmol/L) | 0.97 (0.8 - 1.17) | 0.93 (0.78 - 1.10) | ＜0.001 |  |
| TG (mmol/L) | 4.00 (3.29 - 4.78) | 3.88 (3.27 - 4.68) | 0.02 |  |
| Creatinine (μmol/L) | 73 (62 - 84) | 74.87 (64.00 - 86.00) |  |  |
| WBC (×109/L) | 6.70 (5.62 - 8.04) | 6.92 (5.80 - 8.28) | ＜0.001 |  |
| Neutrophil (%) | 59.21 ± 10.53 | 60.90 ± 11.28 | ＜0.001 |  |
| Lymphocyte (%) | 30.45 ± 9.23 | 28.68 ± 9.42 | 0.09 |  |
| Monocyte (%) | 7.11 ± 2.43 | 7.14 ± 2.51 | 0.003 |  |
| Hemoglobin (g/L) | 140.16 ± 16.00 | 139.64 ± 18.59 | 0.1 |  |
| Platelet (×109/L) | 204 (168-243) | 209 (173-252) | ＜0.001 |  |

BMI: Body mass index; SBP: systolic blood pressure; DBP: diastolic blood pressure; LVEF: Left Ventricle Ejection fraction; TG: triglyceride; TC: total cholesterol; LDL-C: low-density lipoprotein cholesterol; HDL-C: high-density lipoprotein cholesterol.

**Supplemental Table S3:** Univariate and multivariate Logistic regression analyses for predictors of CAD

|  | Univariate analysis | Multivariate analysis | | |
| --- | --- | --- | --- | --- |
|  | P-Value | P-Value | OR | 95% CI |
| Age (years) | <0.001 | <0.001 | 1.05 | 1.04-1.05 |
| Male, n (%) | <0.001 | <0.001 | 2.39 | 2.13-2.68 |
| Body mass index (kg/m2) | <0.001 | 0.001 | 1.02 | 1.01-1.03 |
| Current drinking, n (%) | <0.001 | <0.001 | 0.67 | 0.96-1.29 |
| Blood glucose (mmol/L) | <0.001 | <0.001 | 1.15 | 1.12-1.18 |
| Stroke, n (%) | 0.014 |  |  |  |
| Left ventricle ejection fraction (%) | <0.001 |  |  |  |
| Triglycerides (mmol/l) | <0.001 | <0.001 | 1.24 | 1.18-1.30 |
| White blood cell (×109/L) | <0.001 | 0.047 | 1.01 | 1.00-1.06 |
| Neutrophil (%) | <0.001 | 0.007 | 1.00 | 1.00-1.02 |
| Platelet (×109/L) | 0.083 | <0.001 | 1.00 | 1.00-1.00 |
| Lymphocyte (%) | <0.001 |  |  |  |
| Hemoglobin (g/l) | <0.001 |  |  |  |
| MHR | <0.001 | <0.001 | 1.47 | 1.22-1.78 |
| Constant |  | <0.001 | 0.03 |  |

CI: confidence interval; OR: odds ratio; CAD: chronic coronary artery disease; MHR: monocyte to high-density lipoprotein cholesterol ratio.

**Supplemental Table S4:** Univariate and multivariate logistic regression analyses for predictors of ACS

|  | Univariate analysis |  | Multivariate analysis | | |
| --- | --- | --- | --- | --- | --- |
|  | P-value |  | P-value | OR | 95% CI |
| Age (years), | <0.001 |  |  |  |  |
| Male, n (%) | <0.001 |  | <0.001 | 1.68 | 1.37-2.08 |
| Body mass index (kg/m2) | <0.001 |  | <0.001 | 1.50 | 1.26-1.80 |
| Current drinking, n (%) | 0.046 |  |  |  |  |
| Blood glucose (mmol/L) | <0.001 |  | <0.001 | 1.09 | 1.06-1.11 |
| Hypertension, n (%) | <0.001 |  | <0.001 | 1.59 | 1.37-1.85 |
| Left Ventricle Ejection fraction (%) | <0.001 |  | <0.001 | 0.98 | 0.97-0.99 |
| Dyslipidaemia, n (%) | 0.101 |  |  |  |  |
| White blood cell (×109/L) | <0.001 |  |  |  |  |
| Neutrophil (%) | <0.001 |  | <0.001 | 1.03 | 1.03-1.04 |
| Platelet (×109/L) | <0.001 |  | <0.001 | 1.00 | 1.00-1.01 |
| MHR | <0.001 |  | <0.001 | 2.85 | 2.31-3.53 |
| Constant |  |  | <0.001 | 0.00 |  |

CI: confidence interval; OR: odds ratio; ACS: acute coronary syndrome; CAD: chronic coronary artery disease; MHR: monocyte to high-density lipoprotein cholesterol ratio.
